# Supplementary material for: Steam Activation of Acid-Chars for Enhanced Textural Properties and Pharmaceuticals Removal
Source: MDPI journal article supplement (doi:10.3390/nano12193480), 2022-10-05
Supplement: s1 [file s1]

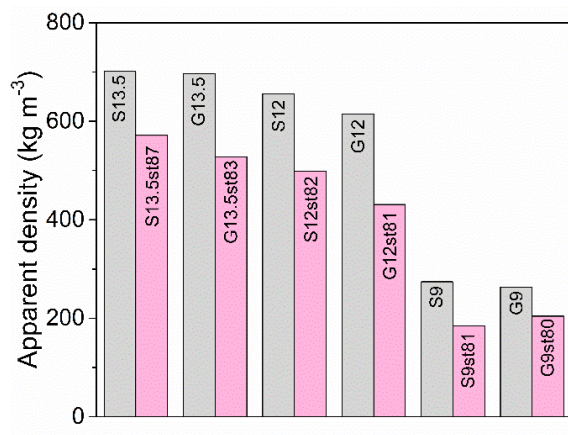

**Figure S1.** Effect of activation process on apparent density of obtained acid char and AC samples.

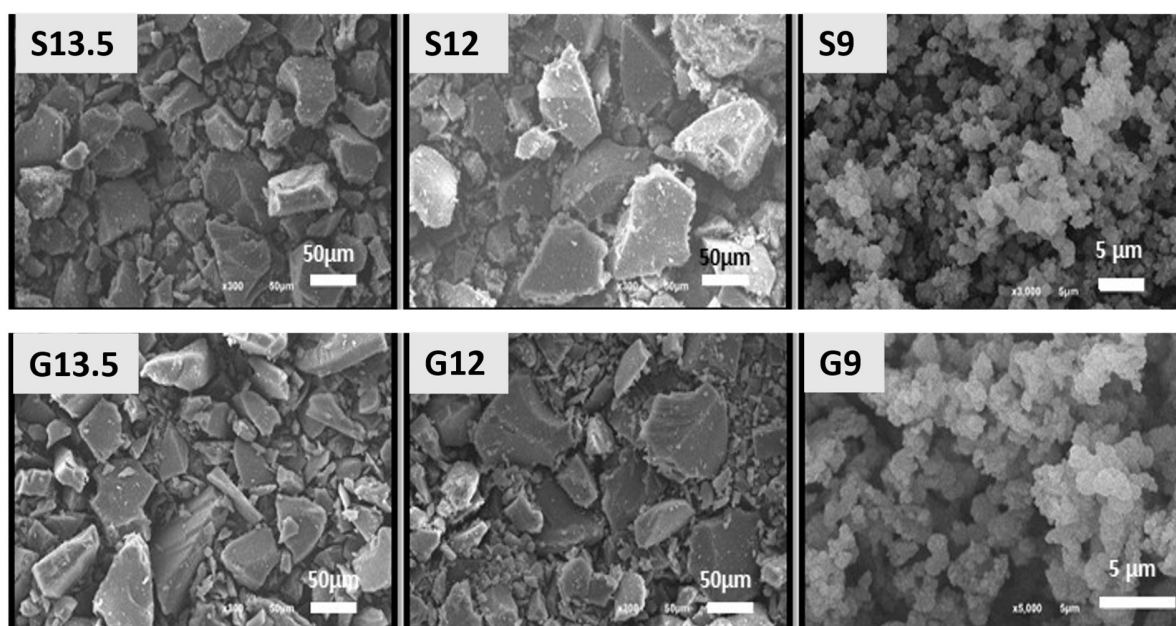

**Figure S2.** SEM images of acid-char samples obtained by sisal and glucose precursors.

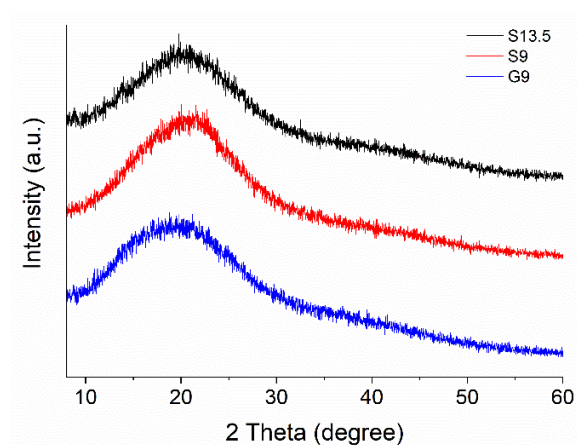

**Figure S3.** Powder XRD of selected acid-char materials.

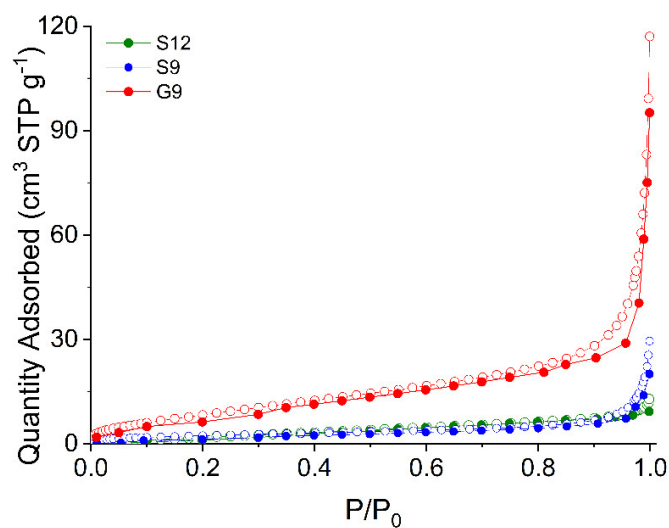

**Figure S4.**  $N_2$  adsorption-desorption isotherms of sisal- and glucose-based acid-chars.

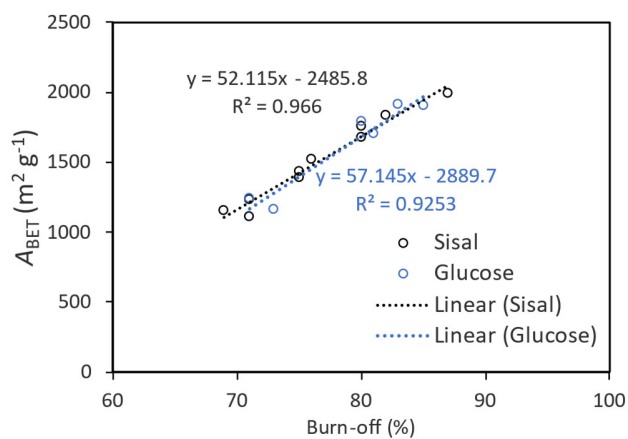

**Figure S5.** Linear relation between BET area values and burn-off degree during the acid-char steam activation.

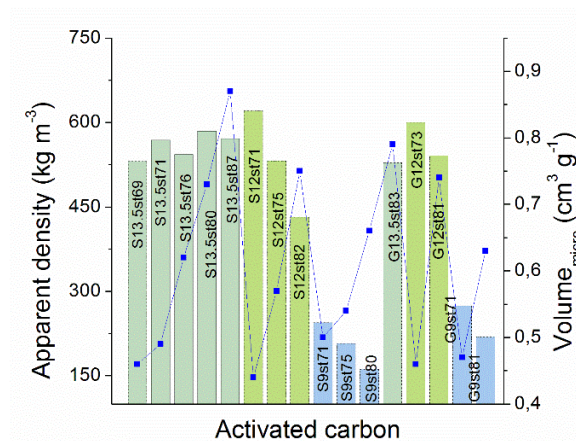

**Figure S6.** Relation between apparent density and micropore volume of the activated carbons.
